# Supplementary material for: Variant antigen repertoires inTrypanosoma congolensepopulations and experimental infections can be profiled from deep sequence data using universal protein motifs
Source: HighWire-hosted journal article supplement (doi:10.1101/gr.234146.118), 2018-07-13
Supplement: Supplemental_Material.zip [file Supplemental_Table_S1.pdf › Supplemental_Material/Supplemental_Table_S1.pdf]

**Supplemental Table S1** Description of samples used in the study, their sequencing and assembly statistics.

| Sample ID | Year | Host       | Passage Species | Country      | Location         | Number of reads | n50  |
|-----------|------|------------|-----------------|--------------|------------------|-----------------|------|
| IL1180    | 1961 | Lion       | Mouse           | Tanzania     | Serengeti        | 1.16E+07        | 207  |
| IL2068    | 1971 | unknown    | Mouse           | Tanzania     | Serengeti        | 6.80E+05        | 1977 |
| IL2281    | 1979 | Cattle     | Mice            | Nigeria      | Zaria            | 1.33E+07        | 1075 |
| IL2326    | 1962 | Cattle     | Mice            | Uganda       | Uganda           | 8.18E+05        | 1599 |
| IL274     | 1976 | Dog        | Mice            | Kenya        | Kabete           | 2.19E+06        | 611  |
| IL2992    | 1966 | Cattle     | Mice            | Kenya        | Transmara        | 2.14E+06        | 1114 |
| IL2995    | 1983 | Cattle     | Rat             | Burkina Faso | Bobo Upper Delta | 2.91E+06        | 223  |
| IL3019    | 1966 | Cattle     | Mice            | Kenya        | Transmara        | 2.22E+06        | 1072 |
| IL3021    | 1966 | Cattle     | Mice            | Kenya        | Transmara        | 1.87E+06        | 1089 |
| IL3022    | 1966 | Cattle     | Mice            | Kenya        | Transmara        | 3.06E+06        | 633  |
| IL3035    | 1985 | Cattle     | Mice            | Kenya        | Muhaka           | 2.26E+06        | 609  |
| IL311     | 1979 | Cattle     | Rat             | The Gambia   | unknown          | 8.33E+05        | 3257 |
| IL3180    | 1966 | Cattle     | Mice            | Kenya        | Transmara        | 1.57E+06        | 1550 |
| IL3296    | 1972 | Cattle     | Mice            | Tanzania     | Robanda          | 1.68E+06        | 889  |
| IL3304    | 1967 | Cattle     | Mice            | Nigeria      | Zaria            | 8.11E+05        | 397  |
| IL3349    | 1966 | Cattle     | Mice            | Kenya        | Transmara        | 8.37E+05        | 993  |
| IL3578    | 1983 | Cattle     | Rat             | Burkina Faso | Bobo Upper Delta | 6.83E+05        | 161  |
| IL3674    | 1979 | Cattle     | Rat             | The Gambia   | unknown          | 3.37E+06        | 1113 |
| IL3675    | 1979 | Cattle     | Rat             | The Gambia   | unknown          | 3.24E+06        | 1615 |
| IL3686    | 1982 | Lion       | Mice            | Kenya        | Kenya            | 2.24E+06        | 190  |
| IL3688    | 1982 | Lion       | Mice            | Kenya        | Kenya            | 2.86E+06        | 912  |
| IL374     | 1976 | Dog        | Mice            | Kenya        | Kabete           | 1.63E+06        | 1217 |
| IL3775    | 1966 | Cattle     | Rat             | Kenya        | Transmara        | 2.95E+06        | 1133 |
| IL3779    | 1991 | Tsetse fly | Mice            | Kenya        | Nguruman         | 6.19E+05        | 324  |
| IL3897    | 1982 | Cattle     | Mice            | Burkina Faso | Bobo Upper Delta | 4.08E+06        | 528  |
| IL3900    | 1980 | Dog        | Mice            | Burkina Faso | Bobo Upper Delta | 6.09E+06        | 314  |
| IL3926    | 1980 | Dog        | Mice            | Burkina Faso | Bobo Upper Delta | 2.34E+06        | 235  |
| IL3932    | 1992 | Horse      | Goat            | Kenya        | Delmonte         | 2.22E+06        | 930  |
| IL3949    | 1972 | Cattle     | Cattle          | Kenya        | Taita            | 2.03E+06        | 665  |
| IL3954    | 1967 | Cattle     | Mice            | Nigeria      | Zaria            | 4.90E+06        | 271  |
| IL396     | 1976 | Dog        | Mice            | Kenya        | Nairobi          | 4.05E+06        | 736  |
| IL3978    | 1992 | Cattle     | Mice            | unknown      | unknown          | 5.53E+06        | 511  |
| IL399     | 1976 | Dog        | Mice            | Kenya        | Kabete           | 2.97E+06        | 741  |
| IL409     | 1976 | Dog        | Mice            | Kenya        | Kabete           | 4.75E+06        | 361  |
| IL410     | 1976 | Dog        | Mice            | Kenya        | Kabete           | 2.18E+06        | 955  |
| IL438     | 1976 | Dog        | Mice            | Kenya        | Kabete           | 9.49E+05        | 418  |
| IL439     | 1976 | Dog        | Mice            | Kenya        | Kabete           | 3.08E+06        | 727  |
| IL588     | 1962 | Cattle     | Mice            | Uganda       | Uganda           | 6.88E+05        | 674  |
| ILC22     | 1970 | Cattle     | Rat             | Tanzania     | Serengeti        | 3.58E+06        | 730  |
| ILC55     | 1976 | Dog        | Mice            | Kenya        | Kabete           | 9.49E+05        | 454  |
| ILC66     | 1976 | Dog        | Mice            | Kenya        | Kabete           | 3.72E+06        | 366  |
