# Supplementary material for: Variant antigen repertoires inTrypanosoma congolensepopulations and experimental infections can be profiled from deep sequence data using universal protein motifs
Source: HighWire-hosted journal article supplement (doi:10.1101/gr.234146.118), 2018-07-13
Supplement: Supplemental_Material.zip [file Supplemental_Table_S2.pdf › Supplemental_Material/Supplemental_Table_S2.pdf]

**Supplemental Table S2** Transcriptomics statistics and number of VSG transcripts recovered per sample for infection 2 (N=24).

| Sample ID | Read pairs | Transcripts | Maximum FPKM | VSG transcripts | Maximum FPKM |
|-----------|------------|-------------|--------------|-----------------|--------------|
| 1         | 3.19E+07   | 10695       | 3906.16      | 110             | 127.93       |
| 2         | 2.87E+07   | 9920        | 2505.62      | 63              | 270.35       |
| 3         | 2.32E+07   | 11073       | 2114.95      | 108             | 125.93       |
| 4         | 3.79E+07   | 9554        | 1798.98      | 52              | 183          |
| 5         | 2.24E+07   | 9501        | 2981.22      | 52              | 152          |
| 6         | 2.14E+07   | 8524        | 1355.24      | 43              | 138.16       |
| 7         | 2.82E+07   | 9619        | 4104.68      | 75              | 156.65       |
| 8         | 2.91E+07   | 6493        | 5621.37      | 36              | 155.84       |
| 9         | 3.50E+07   | 8374        | 1952.73      | 62              | 159.18       |
| 10        | 2.52E+07   | 6462        | 3119.37      | 46              | 191.9        |
| 11        | 2.77E+07   | 9768        | 4817.29      | 54              | 128.46       |
| 12        | 2.04E+07   | 6628        | 4026.51      | 31              | 131.78       |
| 13        | 3.23E+07   | 10694       | 2093.85      | 120             | 102.88       |
| 14        | 3.36E+07   | 7335        | 2729.18      | 79              | 431.31       |
| 15        | 4.00E+07   | 11437       | 2012.88      | 147             | 176.31       |
| 16        | 3.79E+07   | 8952        | 2368.46      | 68              | 173.21       |
| 17        | 3.24E+07   | 10811       | 1869.47      | 114             | 213.47       |
| 18        | 3.29E+07   | 11466       | 3003.4       | 94              | 222.41       |
| 19        | 4.13E+07   | 10456       | 2213.25      | 90              | 186.71       |
| 20        | 2.67E+07   | 10490       | 1754.01      | 114             | 150.43       |
| 21        | 3.49E+07   | 10243       | 1455.93      | 105             | 131.23       |
| 22        | 3.31E+07   | 8734        | 3346.27      | 118             | 634.24       |
| 23        | 3.16E+07   | 7200        | 1608.64      | 53              | 181.42       |
| 24        | 2.35E+07   | 9415        | 2696.13      | 66              | 316.45       |
